# Supplementary material for: Low-crystalline iron oxide hydroxide nanoparticle anode for high-performance supercapacitors
Source: PubMed Central journal article supplement (PMC5343484; doi:10.1038/ncomms14264), 2017-03-06
Supplement: ncomms14264-s1.pdf [file ncomms14264-s1.pdf]

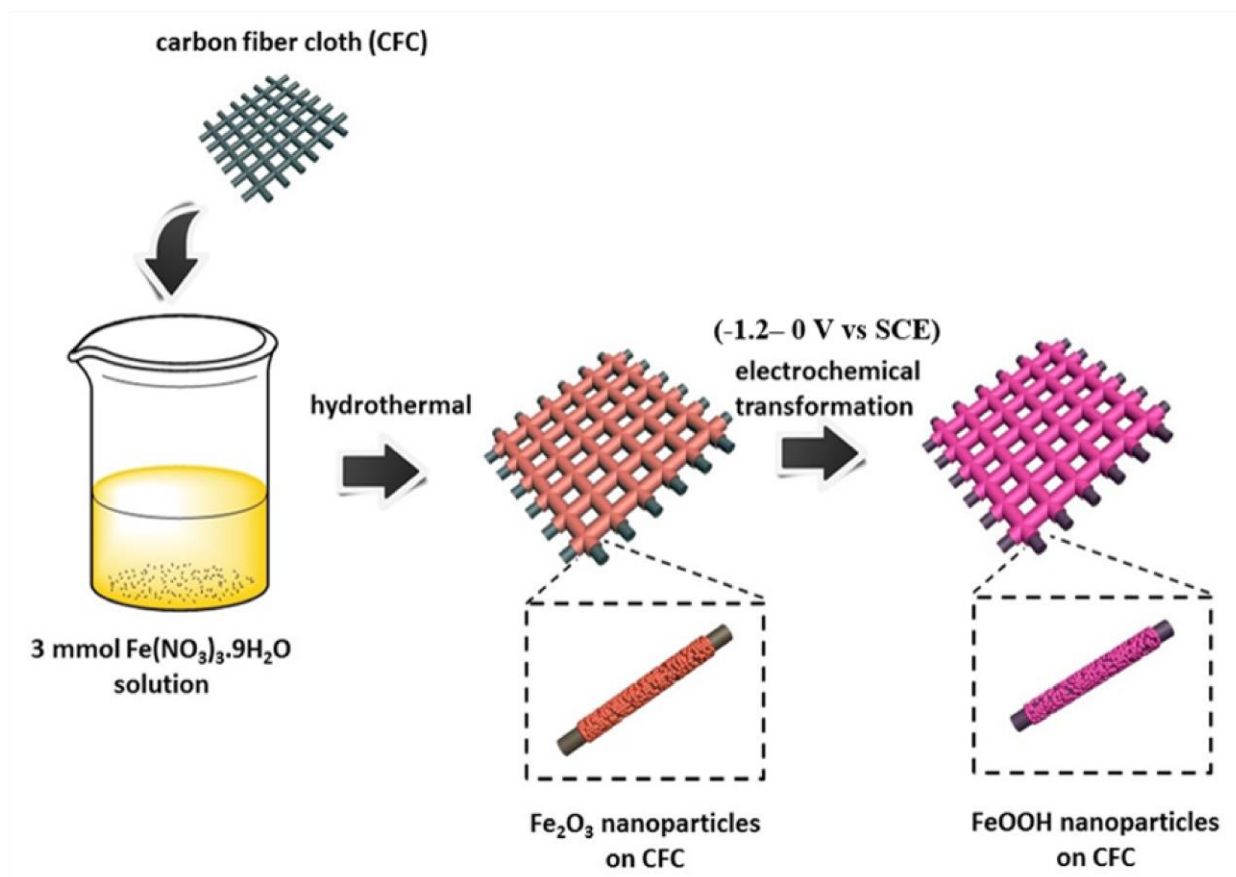

**Supplementary Figure 1 | Schematic illustration of the synthesis process of iron oxide hydroxide (FeOOH) nanoparticle anode.** FeOOH nanoparticle anode was achieved through a two-step process which involves the hydrothermal growth of iron oxide ( $\alpha\text{-Fe}_2\text{O}_3$ ) nanoparticles on carbon fiber cloth (CFC) substrates and subsequent transformation during the electrochemical cycles in the potential range between  $-1.2$  and  $0$  V *versus* saturated calomel electrode (SCE). The low-crystalline FeOOH nanoparticles remain stable after transformation.

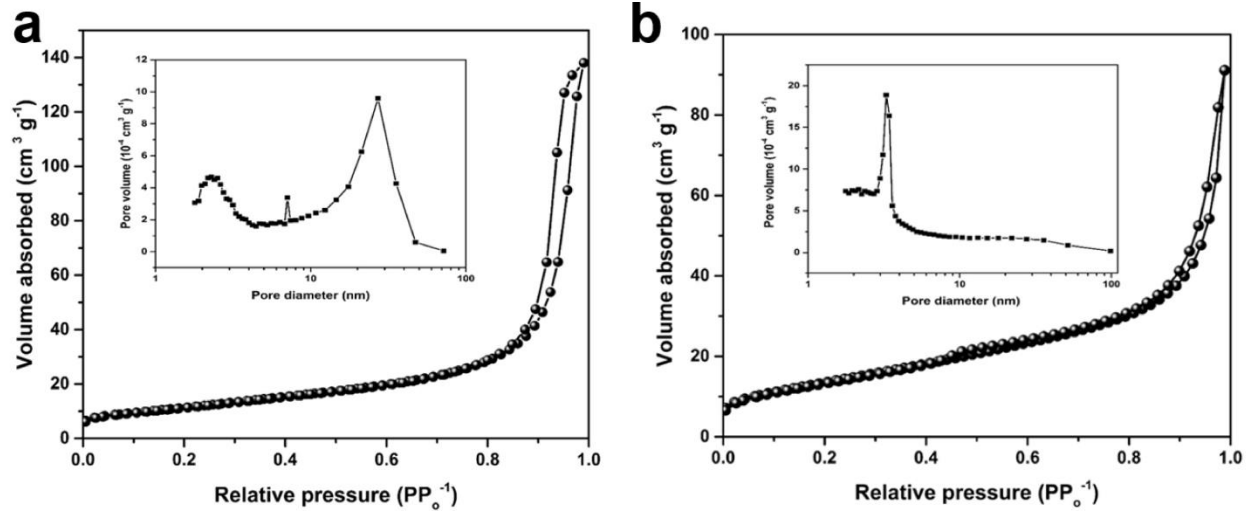

**Supplementary Figure 2 | Nitrogen sorption results.** The nitrogen adsorption-desorption isotherms of (a)  $\alpha\text{-Fe}_2\text{O}_3$  electrode and (b)  $\text{NiMoO}_4$  electrode. The insets show the corresponding pore size distributions.

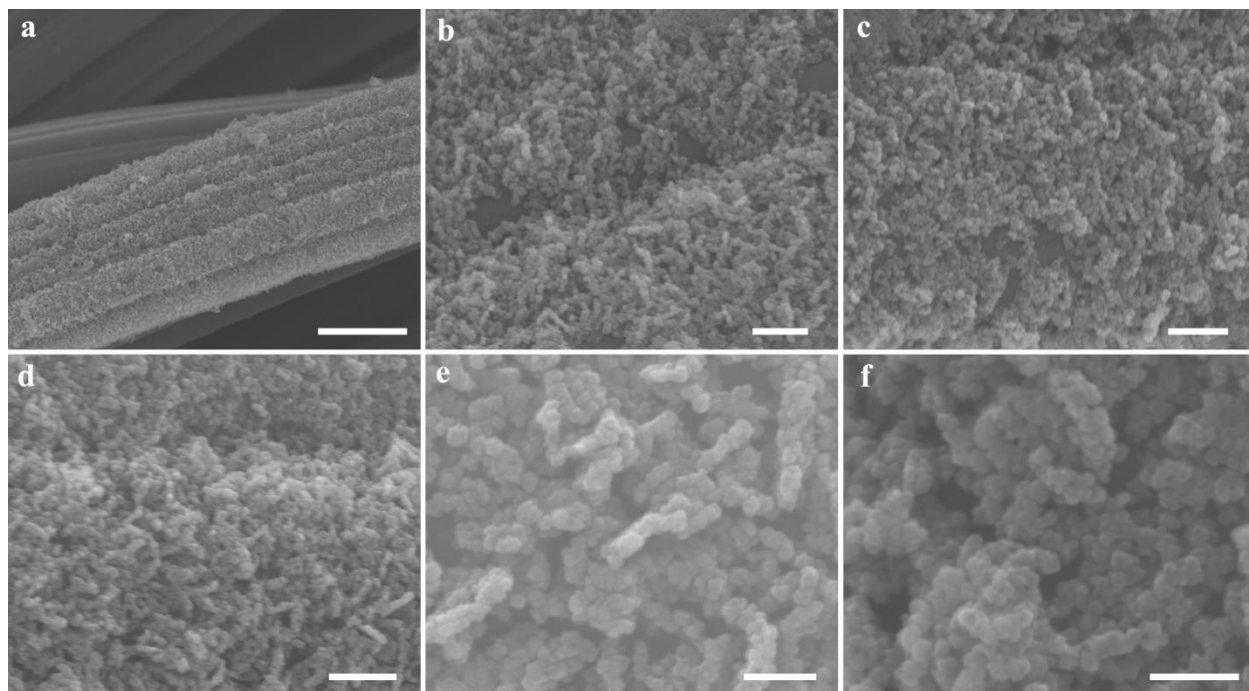

**Supplementary Figure 3 | SEM images of the FeOOH nanoparticles at different magnifications.** Scale bars (a) 5 μm, (b) 500 nm, (c) 500 nm, (d) 500 nm, (e) 200 nm, and (f) 200 nm.

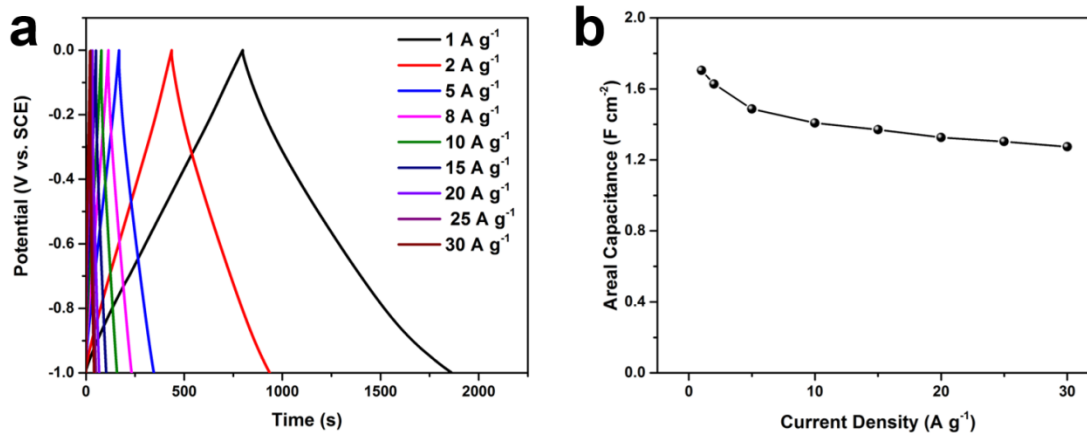

**Supplementary Figure 4 | Electrochemical characterization of FeOOH electrode.** (a) The galvanostatic charge/discharge curves of FeOOH anode at current densities ranging from 1 to 30 A g<sup>-1</sup> (mass loading: 1.6 mg cm<sup>-2</sup>). Saturated calomel electrode (SCE) is used as the reference electrode. (b) A plot of areal capacitance of the FeOOH anode as a function of current density (1 to 30 A g<sup>-1</sup>).

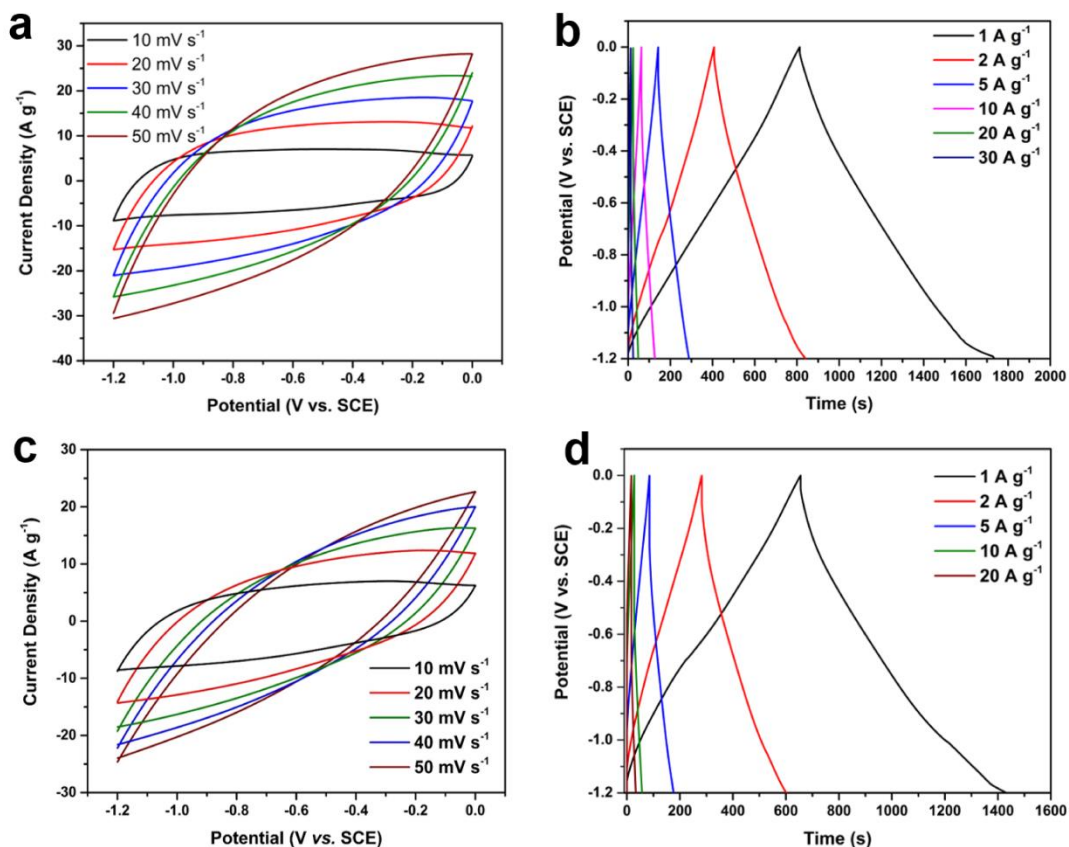

**Supplementary Figure 5 | Electrochemical analysis of FeOOH anode at high mass loadings.** (a,b) CV and galvanostatic charge/discharge curves at 5.6 mg cm<sup>-2</sup> mass loading level. (c,d) CV and galvanostatic charge/discharge curves at 9.1 mg cm<sup>-2</sup> mass loading level. The quasi-rectangular shape CV curves of the low-crystalline FeOOH anode is still maintained at high-mass loadings, which indicate that the dominant capacitive contribution is still present, hence resulting in excellent electrochemical performance. The CV curves become skewed with increasing mass-loadings and the broad peaks disappear, probably due to the increased ion and electron transport resistance/distance.

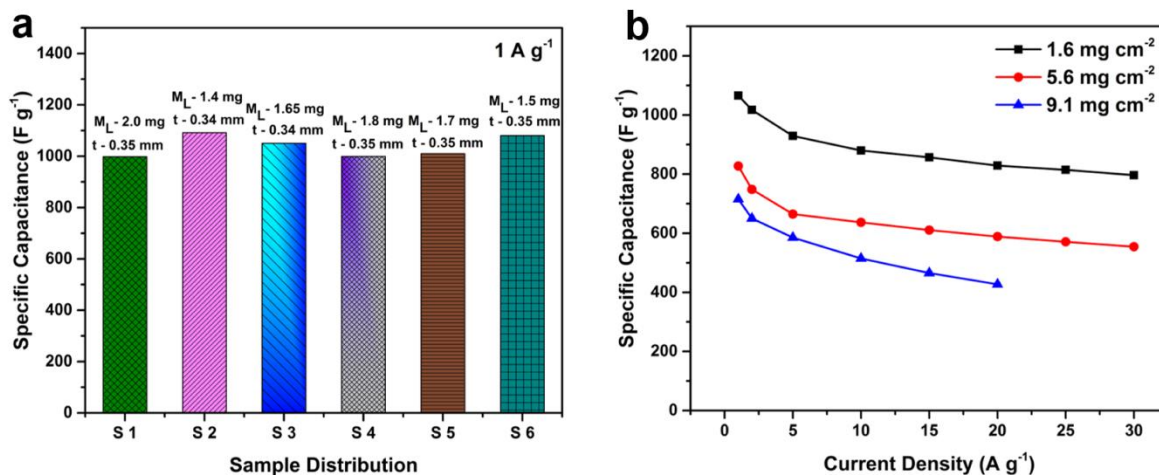

**Supplementary Figure 6** | (a) Specific gravimetric capacitance variation of the FeOOH nanoparticle anode at 1A g<sup>-1</sup>. As depicted in Supplementary Fig. 6a, the low-crystalline FeOOH nanoparticle anode exhibits specific gravimetric capacitances ranging from 998 – 1092 F g<sup>-1</sup> at 1 A g<sup>-1</sup> when the mass loading is between 1.4 – 2 mg cm<sup>-2</sup> with an electrode thickness of ~0.35mm (including the current collector). (b) Rate capability of the low-crystalline FeOOH nanoparticle anode at different mass loadings. At a high mass loading of 9.1 mg cm<sup>-2</sup>, the FeOOH anode retains ~60% of the initial capacitance at 20 A g<sup>-1</sup> (1 A g<sup>-1</sup> = 716 F g<sup>-1</sup>; 20 A g<sup>-1</sup> = 427 F g<sup>-1</sup>) (Supplementary Fig. 6b). ~67% of the capacitance is retained in a 1 – 30 A g<sup>-1</sup> current density range (1 A g<sup>-1</sup> = 827 F g<sup>-1</sup>; 30 A g<sup>-1</sup> = 555 F g<sup>-1</sup>) at a mass loading of 5.6 mg cm<sup>-2</sup>.

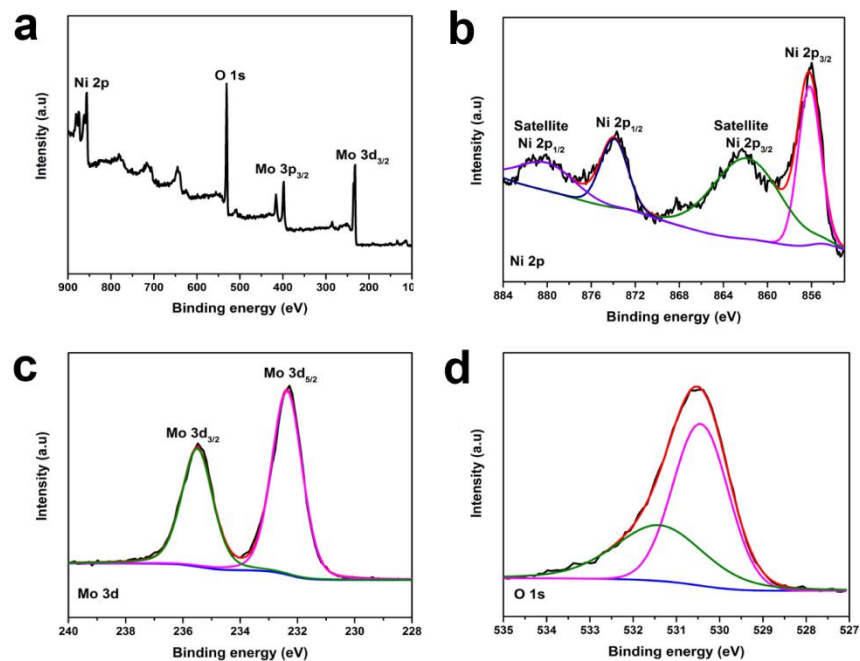

**Supplementary Figure 7 | XPS analysis of NiMoO<sub>4</sub> electrode. (a) Full-scan spectrum. (b, c, d) Core-level XPS spectra of Ni 2p, Mo 3d and O 1s.**

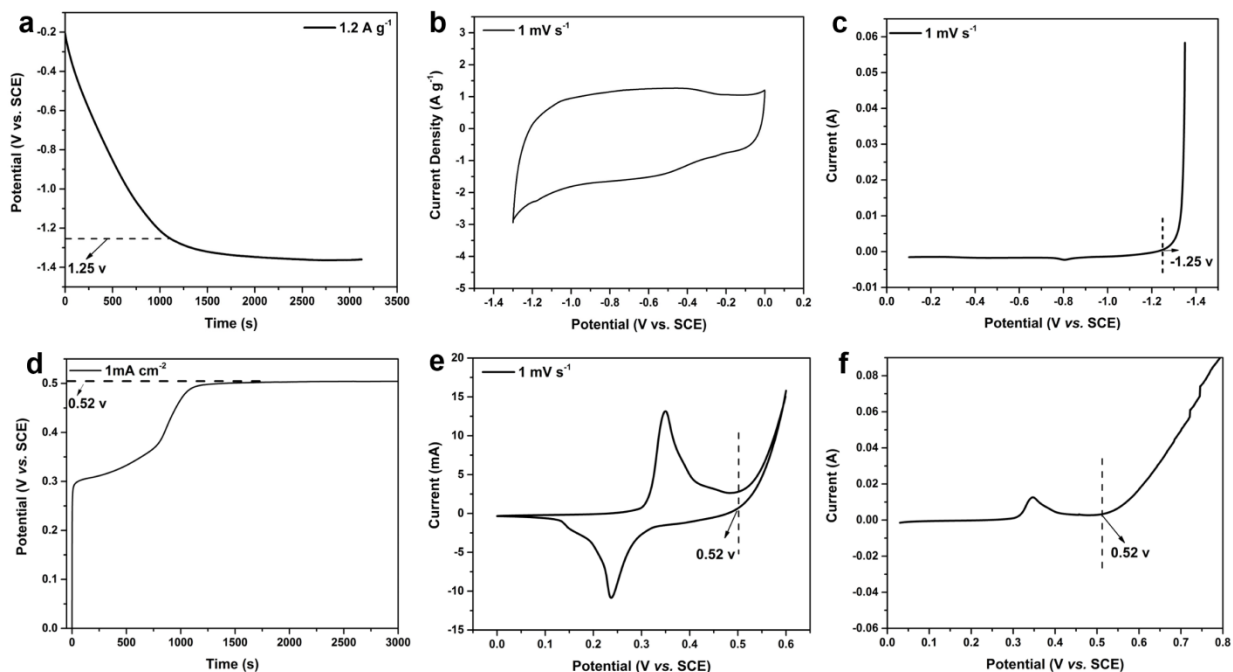

**Supplementary Figure 8 | Water oxidation and reduction potentials of the FeOOH and NiMoO<sub>4</sub> electrodes in 2 M KOH electrolyte.** (a) Discharge curve of low-crystalline FeOOH nanoparticles at the current density of 1.2 A g<sup>-1</sup> in 2 M KOH electrolyte. (b) CV curve of low-crystalline FeOOH nanoparticles at the scan-rate of 1 mV s<sup>-1</sup> in 2 M KOH electrolyte. (c) Hydrogen reduction potential of the low-crystalline FeOOH nanoparticles in 2 M KOH electrolyte. (d) Charge curve of the NiMoO<sub>4</sub> nanowires at the current density of 1 mA cm<sup>-2</sup> in 2 M KOH electrolyte. (e) CV curve of the NiMoO<sub>4</sub> nanowires at a scan rate of 1 mV s<sup>-1</sup> in 2 M KOH electrolyte. (f) Water oxidation potential of the NiMoO<sub>4</sub> nanowires at the scan rate of 1 mV s<sup>-1</sup> in 2 M KOH electrolyte. The NiMoO<sub>4</sub> electrode works in a potential range (up to 0.5 V) exceeding the theoretical oxygen evolution potential in 2 M KOH (~0.163 V). This may be attributed to the kinetically-sluggish oxygen evolution reaction (OER) process. In addition, NiMoO<sub>4</sub> is not an efficient OER catalyst. Hence, oxygen evolution does not occur at the theoretical potential due to polarization.



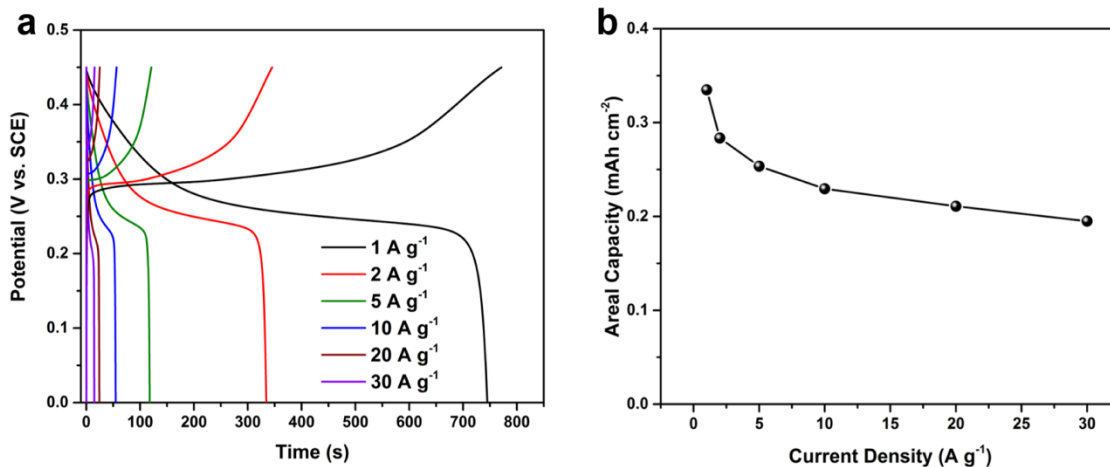

**Supplementary Figure 9 | Electrochemical characterization of NiMoO<sub>4</sub> electrode.** (a) The galvanostatic charge/discharge curves of NiMoO<sub>4</sub> cathode at current densities ranging from 1 to 30 A g<sup>-1</sup>. SCE, saturated calomel electrode. (b) A plot of areal capacity of the NiMoO<sub>4</sub> cathode as a function of current density (1 to 30 A g<sup>-1</sup>).

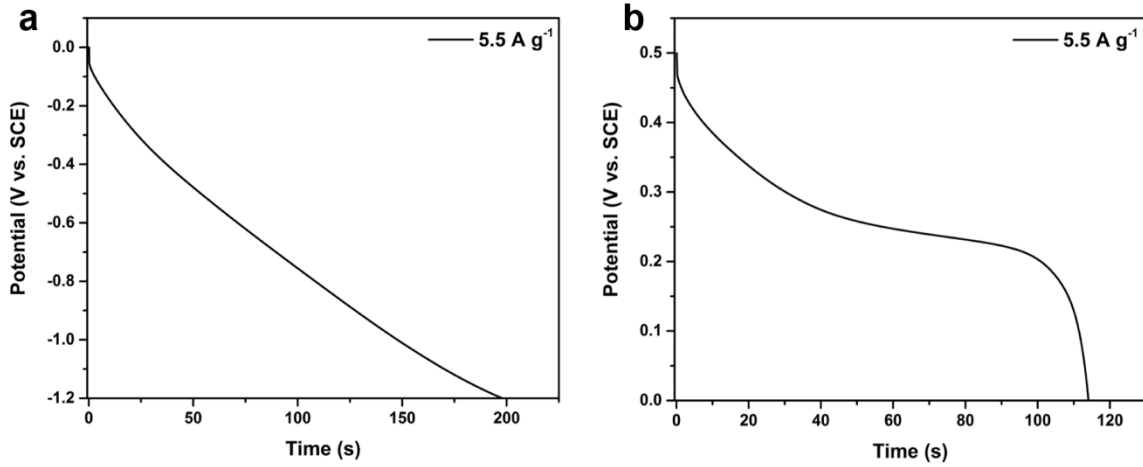

**Supplementary Figure 10 | Galvanostatic discharge curves of FeOOH and NiMoO<sub>4</sub> electrodes at 5.5 A g<sup>-1</sup> for mass balancing. (a)** Galvanostatic discharge curve of the low-crystalline FeOOH nanoparticle anode at 5.5 A g<sup>-1</sup>. **(b)** Galvanostatic discharge curve of the NiMoO<sub>4</sub> nanowire cathode.

For a hybrid supercapacitor, the mass balance is determined as follows.

$$Q_c = Q_b \quad (1)$$

$$Q_c = m_c C_s V_c \quad (2)$$

$$Q_b = m_b C_b \quad (3)$$

Substituting equations 2 and 3 into equations 1

$$m_c C_s V_c = m_b C_b \quad (4)$$

$$\frac{m_c}{m_b} = \frac{C_b}{C_s V_c} \quad (5)$$

Where  $Q_c$  is the charge of the capacitor or pseudocapacitive electrode,  $Q_b$  is the charge of the battery-type electrode,  $m_c$  is the mass of the capacitor or pseudocapacitive electrode,  $C_s$  is the specific capacitance of the capacitor or pseudocapacitive electrode,  $V_c$  is the potential window of the capacitor or pseudocapacitive electrode,  $m_b$  is the mass of the battery-type electrode and  $C_b$  is the capacity of the battery-type electrode.

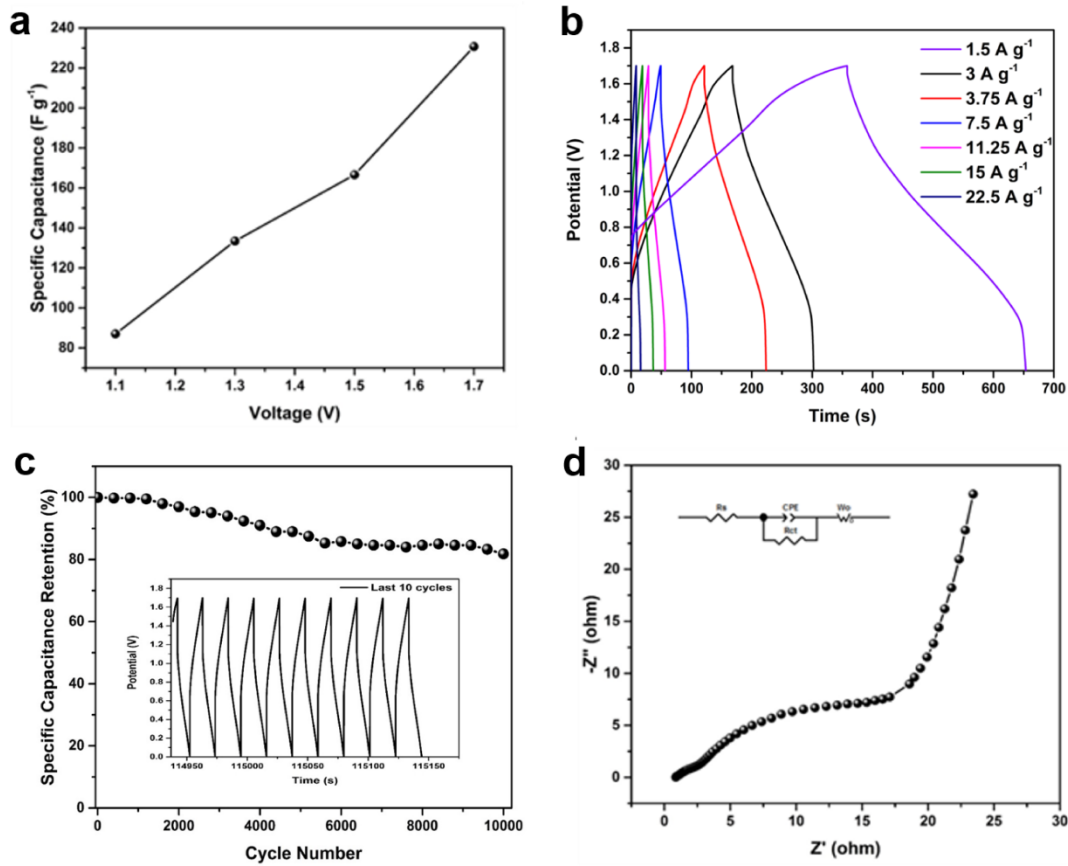

**Supplementary Figure 11 | Electrochemical characterization of  $NiMoO_4/FeOOH$  aqueous hybrid supercapacitor.** (a) The specific capacitance of the  $NiMoO_4/FeOOH$  HSC calculated based on the galvanostatic discharge curves at 11.25  $A g^{-1}$  as a function of voltage window. (b) Galvanostatic charge/discharge curves of  $NiMoO_4/FeOOH$  HSC. (c) Cycling performance of the HSC at a current density of 22.5  $A g^{-1}$ . (d) Nyquist plots of the  $NiMoO_4/FeOOH$  hybrid supercapacitor. The EIS was tested over a 0.01 Hz to  $10^5$  Hz frequency range at an open-circuit potential with AC amplitude of 5 mV.

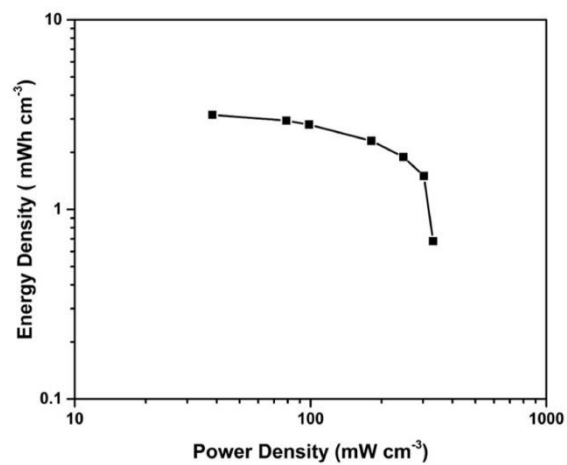

**Supplementary Figure 12 | Volumetric energy density and power density of the NiMoO<sub>4</sub>//FeOOH packaged device.** Active electrode materials account for 6.5% of the total weight.

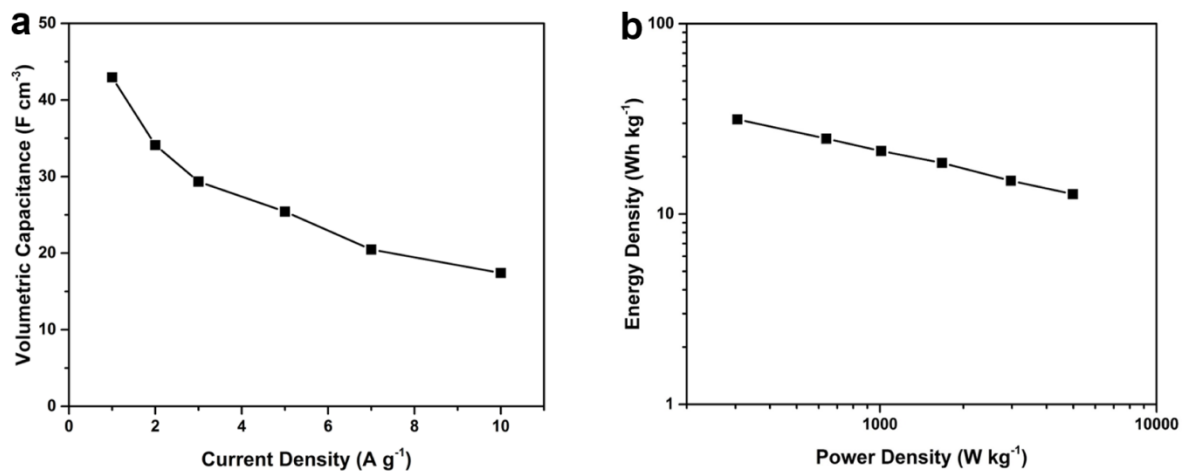

**Supplementary Figure 13** | (a) Volumetric capacitance as a function of current density of the NiMoO<sub>4</sub>//FeOOH packaged device. (b) Gravimetric energy and power densities of the NiMoO<sub>4</sub>//FeOOH packaged device. Active electrode material accounts for 35% of the total weight.

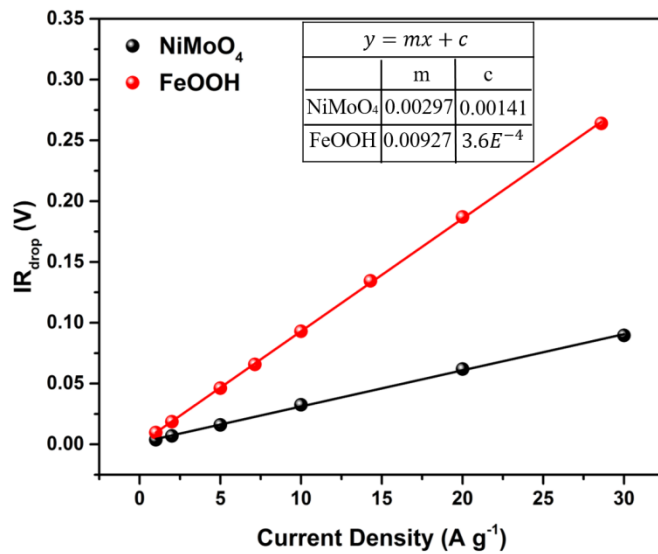

**Supplementary Figure 14 | Voltage drops of the  $\text{NiMoO}_4$  and  $\text{FeOOH}$  electrodes as a function of the current density.** Inset shows the equation of the fitting lines.

**Supplementary Table 1 | Resistance values of the NiMoO<sub>4</sub> and FeOOH electrodes.**

| Sample                | Rs ( $\Omega$ , From EIS Simulation) | Rs ( $\Omega$ , From Potential Drop) | Rct ( $\Omega$ ) |
|-----------------------|--------------------------------------|--------------------------------------|------------------|
| FeOOH                 | 3.59                                 | 3.45                                 | 0.59             |
| FeOOH (after cycling) | 4.10                                 | 4.51                                 | 0.50             |
| NiMoO <sub>4</sub>    | 0.72                                 | 0.85                                 | 0.15             |

There is an increase in the internal resistance ( $R_s$ ) of the low-crystalline FeOOH anode after 10000 charge/discharge cycles which may probably be due to the degradation of the electrolyte since there is no loss of active material during cycling.

**Supplementary Table 2 | The Rietveld refinement results of the NiMoO<sub>4</sub> and  $\alpha$ -Fe<sub>2</sub>O<sub>3</sub>.**

|                                          | a ( $\text{\AA}$ ) | b ( $\text{\AA}$ ) | c ( $\text{\AA}$ ) | $e_0$   | Rwp (%) |
|------------------------------------------|--------------------|--------------------|--------------------|---------|---------|
| NiMoO <sub>4</sub>                       | 9.566(0)           | 8.734(0)           | 7.649(0)           | 0.00640 | 6.853   |
| $\alpha$ -Fe <sub>2</sub> O <sub>3</sub> | 9.566(0)           | 9.566(0)           | 7.649 (0)          | 0.00370 | 6.593   |

**Supplementary Table 3 | Comparison of the electrochemical performance of iron oxide/hydroxides negative electrodes in different aqueous electrolytes.**

| Fe-Based Electrode                                                    | Active Material Mass        | Electrolyte                         | Voltage Range             | Specific Capacitance                             | Capacitance Retention                             | Cycling Ability           | CV Shape             |
|-----------------------------------------------------------------------|-----------------------------|-------------------------------------|---------------------------|--------------------------------------------------|---------------------------------------------------|---------------------------|----------------------|
| Fe <sub>2</sub> O <sub>3</sub> films <sup>[1]</sup>                   | 0.67 mg cm <sup>-2</sup>    | 1 M NaOH                            | 0.1 to -0.6 V vs SCE      | 178 F g <sup>-1</sup> at 5 m V s <sup>-1</sup>   | 121 F g <sup>-1</sup> at 100 mV s <sup>-1</sup>   | Not reported              | Skewed CV shape      |
| Fe <sub>3</sub> O <sub>4</sub> /rGO <sup>[2]</sup>                    | Not reported                | 1 M KOH                             | -0.8 to 0.2 V vs Ag/AgCl  | 890 F g <sup>-1</sup> at 1 A g <sup>-1</sup>     | 480 F g <sup>-1</sup> at 5 A g <sup>-1</sup>      | Stable after 10000 cycles | Redox Peaks          |
| Fe <sub>3</sub> O <sub>4</sub> /rGO <sup>[3]</sup>                    | Not reported                | 1 M LiOH                            | -1.15 to 0.1 V vs SCE     | 326 F g <sup>-1</sup> at 0.5 A g <sup>-1</sup>   | 304 F g <sup>-1</sup> at 10 A g <sup>-1</sup>     | 95% after 1000 cycles     | Redox Peaks          |
| Fe <sub>3</sub> O <sub>4</sub> /CNT composite <sup>[4]</sup>          | 10 mg cm <sup>-2</sup>      | 6 M KOH                             | -1 to 0 V vs SCE          | 129 F g <sup>-1</sup> at 2.5 mA cm <sup>-2</sup> | 103 F g <sup>-1</sup> at 40 mA cm <sup>-2</sup>   | 9% loss after 500 cycles  | Redox Peaks          |
| Fe <sub>2</sub> O <sub>3</sub> particles/graphene <sup>[5]</sup>      | 1 mg cm <sup>-2</sup>       | 1 M KOH                             | -1.15 to -0.3 V vs Hg/HgO | 908 F g <sup>-1</sup> at 2 A g <sup>-1</sup>     | 622 F g <sup>-1</sup> at 50 A g <sup>-1</sup>     | 75% after 200 cycles      | Redox Peaks          |
| Fe <sub>3</sub> O <sub>4</sub> /graphene paper <sup>[6]</sup>         | Not reported                | 1 M KOH                             | -1 to 0 V vs Hg/HgO       | 368 F g <sup>-1</sup> at 1A g <sup>-1</sup>      | 245 F g <sup>-1</sup> at 5 A g <sup>-1</sup>      | Stable after 1000 cycles  | Quasi-rectangular CV |
| Fe <sub>2</sub> O <sub>3</sub> /C <sup>[7]</sup>                      | Not reported                | 2 M KOH                             | -0.7 to 0.2 V vs Ag/AgCl  | 315 F g <sup>-1</sup> at 2 mV s <sup>-1</sup>    | Not reported                                      | 88.9% after 1500 cycles   | Redox Peaks          |
| Nitrogen-doped graphene/Fe <sub>2</sub> O <sub>3</sub> <sup>[8]</sup> | Not reported                | 1 M KOH                             | -1.2 to 0 V vs Ag/AgCl    | 618 F g <sup>-1</sup> at 0.5 A g <sup>-1</sup>   | 350 F g <sup>-1</sup> at 10 A g <sup>-1</sup>     | 56.7% after 5000 cycles   | Redox Peaks          |
| Fe <sub>3</sub> O <sub>4</sub> particles/rGO <sup>[9]</sup>           | Not reported                | 1 M KOH                             | -1 to 0.1 V vs Hg/HgO     | 220.1 F g <sup>-1</sup> at 0.5 A g <sup>-1</sup> | 134.6 F g <sup>-1</sup> at 5 A g <sup>-1</sup>    | Stable for 3000 cycles    | Redox Peaks          |
| Amorphous FeOOH <sup>[10]</sup>                                       | 1.28 mg cm <sup>-2</sup>    | 3 M KOH                             | -1.1 to -0.3 V vs Ag/AgCl | 867.3 F g <sup>-1</sup> at 5 mV s <sup>-1</sup>  | Not reported                                      | 93.3% after 3000 cycles   | Skewed CV shape      |
| γ-FeOOH nanosheets <sup>[11]</sup>                                    | 0.8-1.8 mg cm <sup>-2</sup> | 1 M Li <sub>2</sub> SO <sub>4</sub> | -0.8 to -0.1 vs Ag/AgCl   | 310 F g <sup>-1</sup> at 0.13 A g <sup>-1</sup>  | 219.5 F g <sup>-1</sup> at 12.6 A g <sup>-1</sup> | Not reported              | Quasi-rectangular CV |
| Fe <sub>2</sub> O <sub>3</sub> QD/FGS <sup>[12]</sup>                 | 2-3 mg cm <sup>-2</sup>     | 1 M Na <sub>2</sub> SO <sub>4</sub> | -1 to 0 V vs Ag/AgCl      | 347 F g <sup>-1</sup> at 10 mV s <sup>-1</sup>   | 140 F g <sup>-1</sup> at 1600 mV s <sup>-1</sup>  | Not reported              | Quasi-rectangular CV |
| Fe <sub>2</sub> O <sub>3</sub> nanotubes array <sup>[13]</sup>        | 0.78 mg cm <sup>-2</sup>    | 1 M Li <sub>2</sub> SO <sub>4</sub> | -0.8 to 0 V vs SCE        | 138 F g <sup>-1</sup> at 1.3 A g <sup>-1</sup>   | 91 F g <sup>-1</sup> at 12.8 A g <sup>-1</sup>    | 88.9% after 500 cycles    | Quasi-rectangular CV |



| Fe-Based Electrode                                         | Active Material Mass    | Electrolyte                           | Voltage Range            | Specific Capacitance                            | Capacitance Retention                            | Cycling Ability          | CV Shape             |
|------------------------------------------------------------|-------------------------|---------------------------------------|--------------------------|-------------------------------------------------|--------------------------------------------------|--------------------------|----------------------|
| FeOOH nanoparticles <sup>[14]</sup>                        | Not reported            | 1 M Li <sub>2</sub> SO <sub>4</sub>   | -0.85 to -0.1 V vs SCE   | 148 F g <sup>-1</sup> at 0.5 A g <sup>-1</sup>  | 44 F g <sup>-1</sup> at 20 A g <sup>-1</sup>     | Not reported             | Redox Peaks          |
| FeO <sub>x</sub> -carbon nanofoams <sup>[15]</sup>         | Not reported            | 2.5 M Li <sub>2</sub> SO <sub>4</sub> | -0.8 to 0.2 V vs Ag/AgCl | 84 F g <sup>-1</sup> at 5 mV s <sup>-1</sup>    | Not reported                                     | 80% after 1000 cycles    | Quasi-rectangular CV |
| α-Fe <sub>2</sub> O <sub>3</sub> nanorods <sup>[16]</sup>  | 4.3 mg cm <sup>-2</sup> | 3 M LiCl                              | -0.8 to 0 V vs SCE       | 64.5 F g <sup>-1</sup> at 10 mV s <sup>-1</sup> | 22.8 F g <sup>-1</sup> at 400 mV s <sup>-1</sup> | 95.2% after 10000 cycles | Quasi-rectangular CV |
| α-Fe <sub>2</sub> O <sub>3</sub> /graphene <sup>[17]</sup> | Not reported            | 1 M Na <sub>2</sub> SO <sub>4</sub>   | -1 to 0 V vs Ag/AgCl     | 504 F g <sup>-1</sup> at 2 mA cm <sup>-2</sup>  | Not reported                                     | Not reported             | Quasi-rectangular CV |
| Low-crystalline FeOOH nanoparticles <sup>[this work]</sup> | 1.6 mg cm <sup>-2</sup> | 2 M KOH                               | -1.2 to 0 V vs SCE       | 1066 F g <sup>-1</sup> at 1 A g <sup>-1</sup>   | 796 F g <sup>-1</sup> at 30 A g <sup>-1</sup>    | 91% after 10000 cycles   | Quasi-rectangular CV |
| Low-crystalline FeOOH nanoparticles <sup>[this work]</sup> | 9.1 mg cm <sup>-2</sup> | 2 M KOH                               | -1.2 to 0 V vs SCE       | 716 F g <sup>-1</sup> at 1 A g <sup>-1</sup>    | 427 F g <sup>-1</sup> at 20 A g <sup>-1</sup>    | 86% after 10000 cycles   | Quasi-rectangular CV |

## Supplementary References

1. Kulal, P. M., Dubal, D. P., Lokhande, C. D. & Fulari, V. J. Chemical synthesis of Fe<sub>2</sub>O<sub>3</sub> thin films for supercapacitor application. *J. Alloys and Compd.* **509**, 2567–2571 (2011).
2. Shi, W. *et al.* Achieving high specific charge capacitances in Fe<sub>3</sub>O<sub>4</sub>/reduced graphene oxide nanocomposites. *J. Mater. Chem.* **21**, 3422–3427 (2011).
3. Qu, Q., Yang, S. & Feng, X. 2D sandwich-like sheets of iron oxide grown on graphene as high energy anode material for supercapacitors. *Adv. Mater.* **23**, 5574–5580 (2011).
4. Guan, D. *et al.* Hydrothermal synthesis of carbon nanotube/cubic Fe<sub>3</sub>O<sub>4</sub> nanocomposite for enhanced performance supercapacitor electrode material. *Mater. Sci. Eng.: B* **178**, 736–743 (2013).
5. Wang, H., Xu, Z., Yi, H., Wei, H., Guo, Z. & Wang, X. One-step preparation of single-crystalline Fe<sub>2</sub>O<sub>3</sub> particles/graphene composite hydrogels as high performance anode materials for supercapacitors. *Nano Energy* **7**, 86–96 (2014).
6. Liu, M. & Sun, J. In situ growth of monodisperse Fe<sub>3</sub>O<sub>4</sub> nanoparticles on graphene as flexible paper for supercapacitor. *J. Mater. Chem. A* **2**, 12068–12074 (2014).
7. Sethuraman, B., Purushothaman, K. K. & Muralidharan, G. Synthesis of mesh-like Fe<sub>2</sub>O<sub>3</sub>/C nanocomposite via greener route for high performance supercapacitors. *RSC Adv.* **4**, 4631–4637 (2014).
8. Ma, Z., Huang, X., Dou, S., Wu, J. & Wang, S. One-pot synthesis of Fe<sub>2</sub>O<sub>3</sub> nanoparticles on nitrogen-doped graphene as advanced supercapacitor electrode materials. *J. Phys. Chem. C* **118**, 17231–17239 (2014).
9. Wang, Q., Jiao, L., Du, H., Wang, Y. & Yuan, H. Fe<sub>3</sub>O<sub>4</sub> nanoparticles grown on graphene as advanced electrode materials for supercapacitors. *J. Power Sources* **245**, 101–106 (2014).
10. Chen, J., Xu, J., Zhou, S., Zhao, N. & Wong, C. P. Amorphous nanostructured FeOOH and Co-Ni double hydroxides for high-performance aqueous asymmetric supercapacitors. *Nano Energy* **21**, 145–153 (2016).
11. Chen, Y. C., Lin Y. G., Hsu Y. K., Yen S. C., Chen K. H. & Chen, L. C. Novel iron oxyhydroxide lepidocrocite nanosheet as ultrahigh power density anode material for asymmetric supercapacitors. *Small* **10**, 3803–3810 (2014).
12. Xia, H. *et al.* Facile synthesis of hematite quantum-dot/functionalized graphene-sheet composites as advanced anode materials for asymmetric supercapacitors. *Adv. Funct. Mater.* **25**, 627–635 (2015).
13. Xie, K. *et al.* Highly ordered iron oxide nanotube arrays as electrodes for electrochemical energy storage. *Electrochem. Commun.* **13**, 657–660 (2011).
14. Long, C., Jiang, L., Wei, T., Yan, J. & Fan, Z. High-performance asymmetric supercapacitors with lithium intercalation reaction using metal oxide-based composites as electrode materials. *J. Mater. Chem. A* **2**, 16678–16686 (2014).
15. Sassin, M. B., Mansour, A. N., Pettigrew, K. A., Rolison, D. R. & Long, J. W. Electroless deposition of conformal nanoscale iron oxide on carbon nanoarchitectures for electrochemical charge storage. *ACS Nano* **4**, 4505–4514 (2010).
16. Lu, X. *et al.* Oxygen-deficient hematite nanorods as high-performance and novel negative electrodes for flexible asymmetric supercapacitors. *Adv. Mater.* **26**, 3148–3155 (2014).
17. Low, Q. & Ho, G. Facile structural tuning and compositing of iron oxide-graphene anode towards enhanced supercapacitive performance. *Nano Energy* **5**, 28–35 (2014).
